# Supplementary material
Source: PubMed Central journal article supplement (PMC3555048)
Supplement: bcp0075-0079-SD1.pdf [file bcp0075-0079-SD1.pdf]

## Supporting information

### Supplementary figures (S1 –S3)

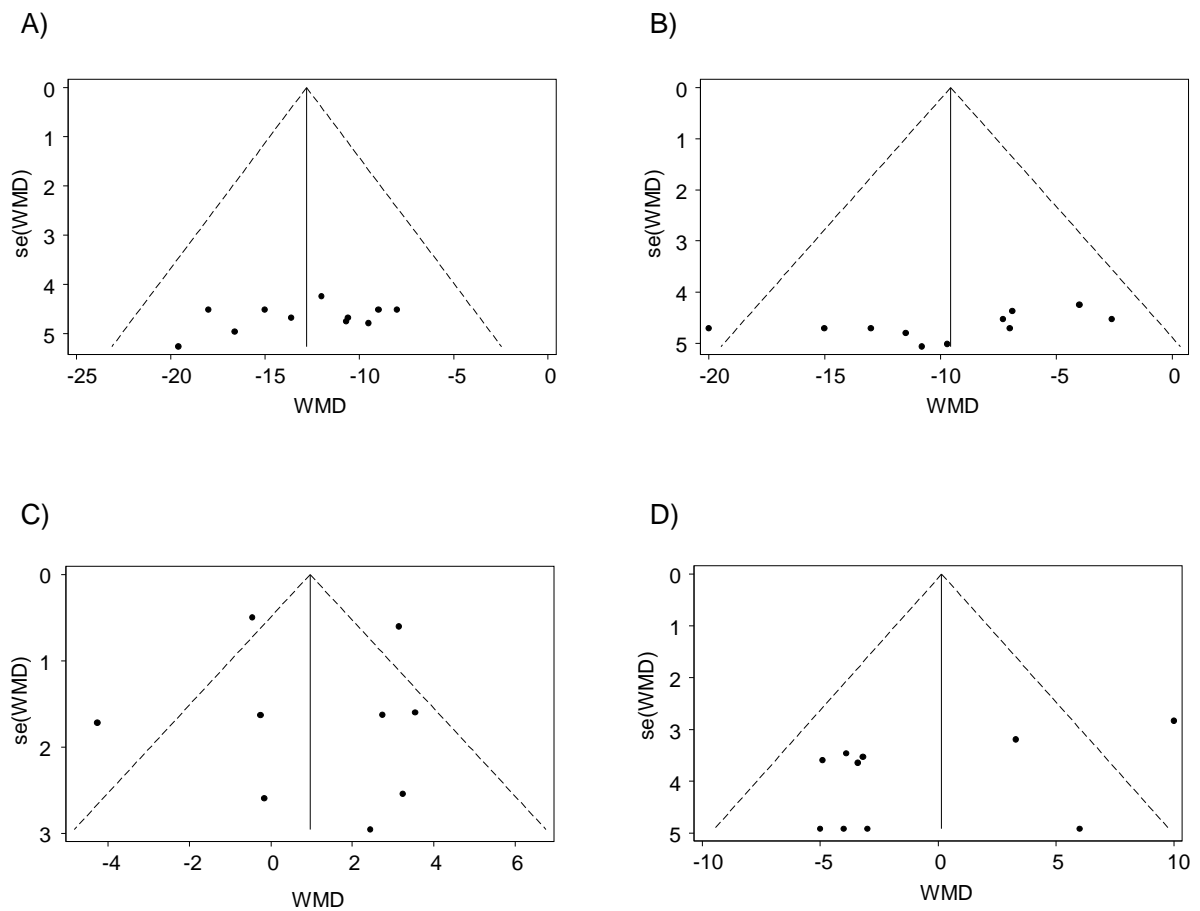

Figure S1: Funnel plots with pseudo 95% confidence limits for A) Effect of different classes of antihypertensive monotherapy vs. placebo on brachial systolic blood pressure (Figure 2) B) Effect of different classes of antihypertensive monotherapy vs. placebo on central systolic blood pressure (Figure 3) C) Effect of different combination of classes of antihypertensive drugs on placebo-adjusted differences between central systolic blood pressure and brachial systolic blood pressure (Figure 5) D) Effect of antihypertensive monotherapy compared to placebo on augmentation index (Figure 6).

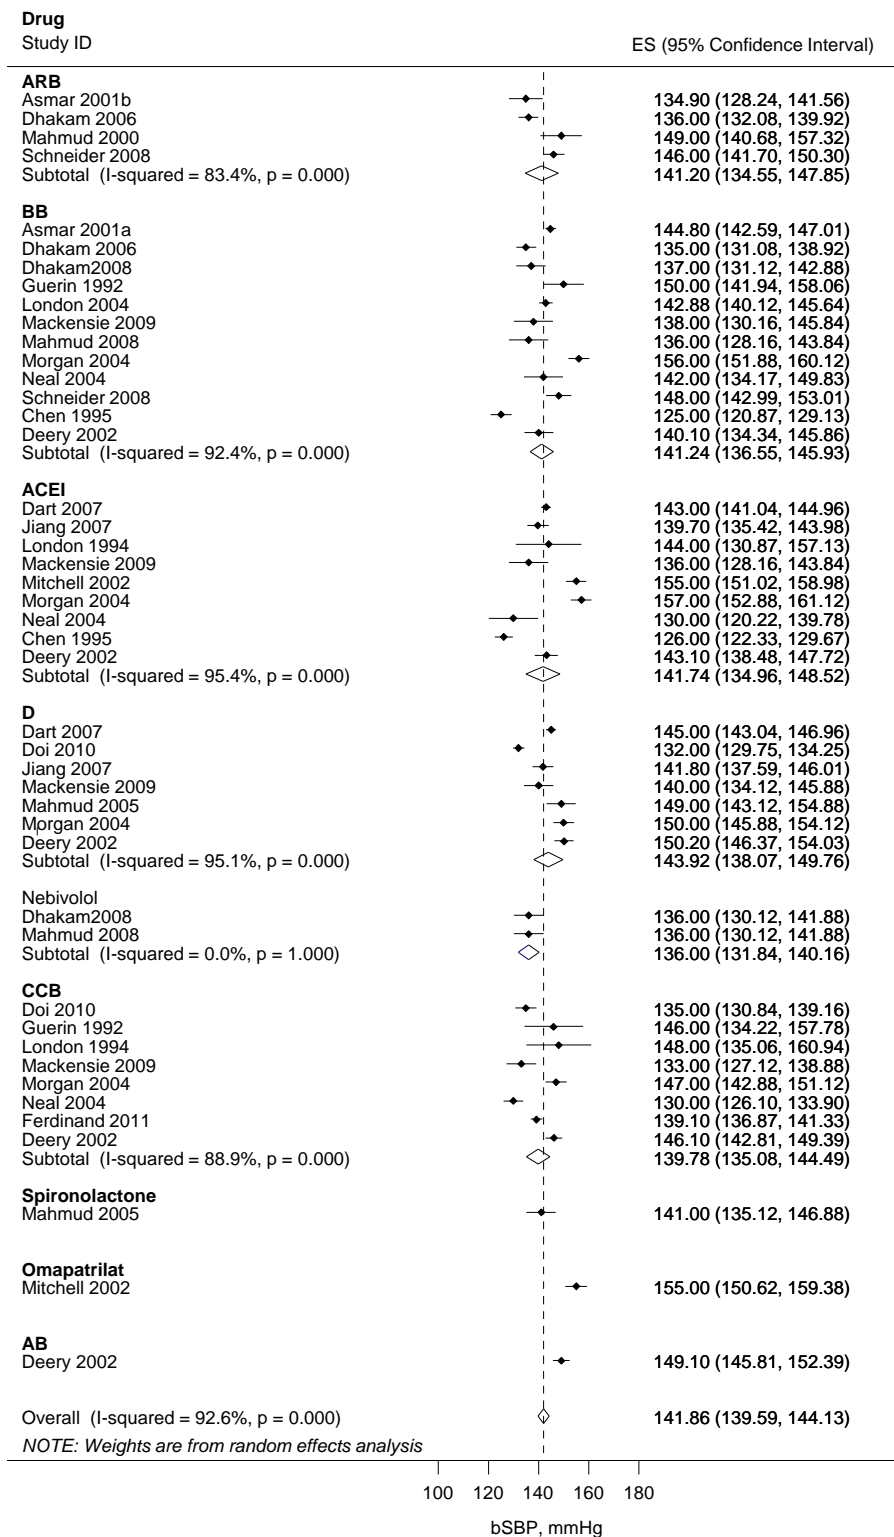

Figure S2: Effect of different classes of antihypertensive monotherapy on brachial systolic blood pressure (bSBP). Abbreviations ACEI, angiotensin converting enzyme inhibitor; ARB, angiotensin receptor blocker; BB, beta blocker; CCB, calcium channel blocker; D, thiazide diuretic; ES, effect size.

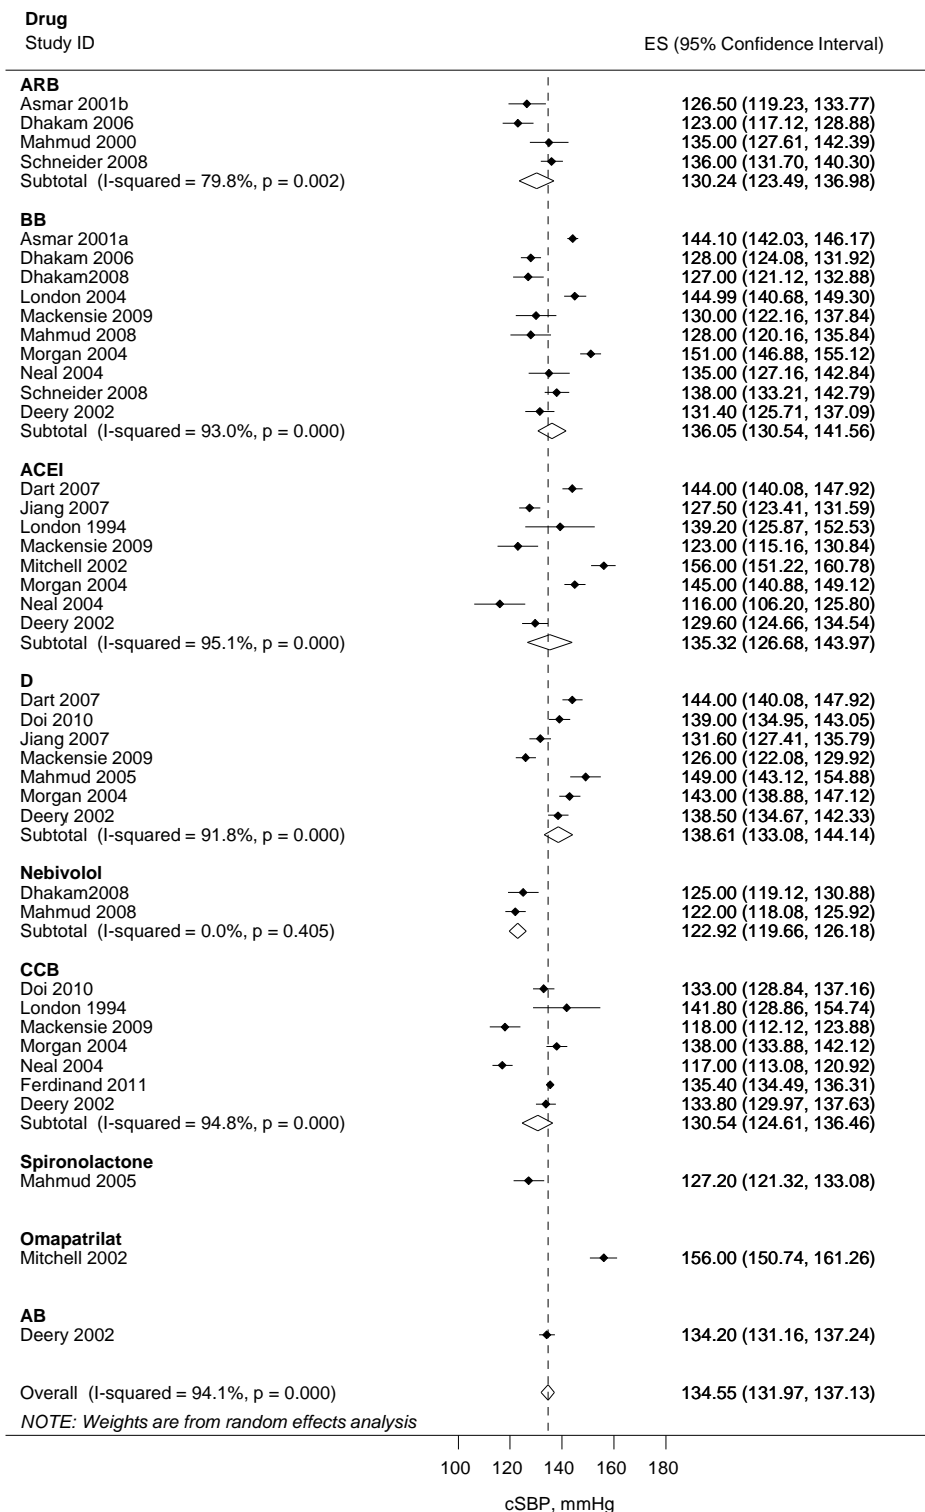

Figure S3: Effect of different classes of antihypertensive monotherapy on central systolic blood pressure (cSBP). Abbreviations ACEI, angiotensin converting enzyme inhibitor; ARB, angiotensin receptor blocker; BB, beta blocker; CCB, calcium channel blocker; D, thiazide diuretic; ES, effect size.
